# Supplementary material for: A large piezoelectric voltage coefficient in aluminate-sodalite-type improper ferroelectric oxides
Source: Royal Society of Chemistry journal article supplement (doi:10.1039/d1tc03897d), 2021-01-01
Supplement: d1tc03897d1.pdf [file d1tc03897d1.pdf]

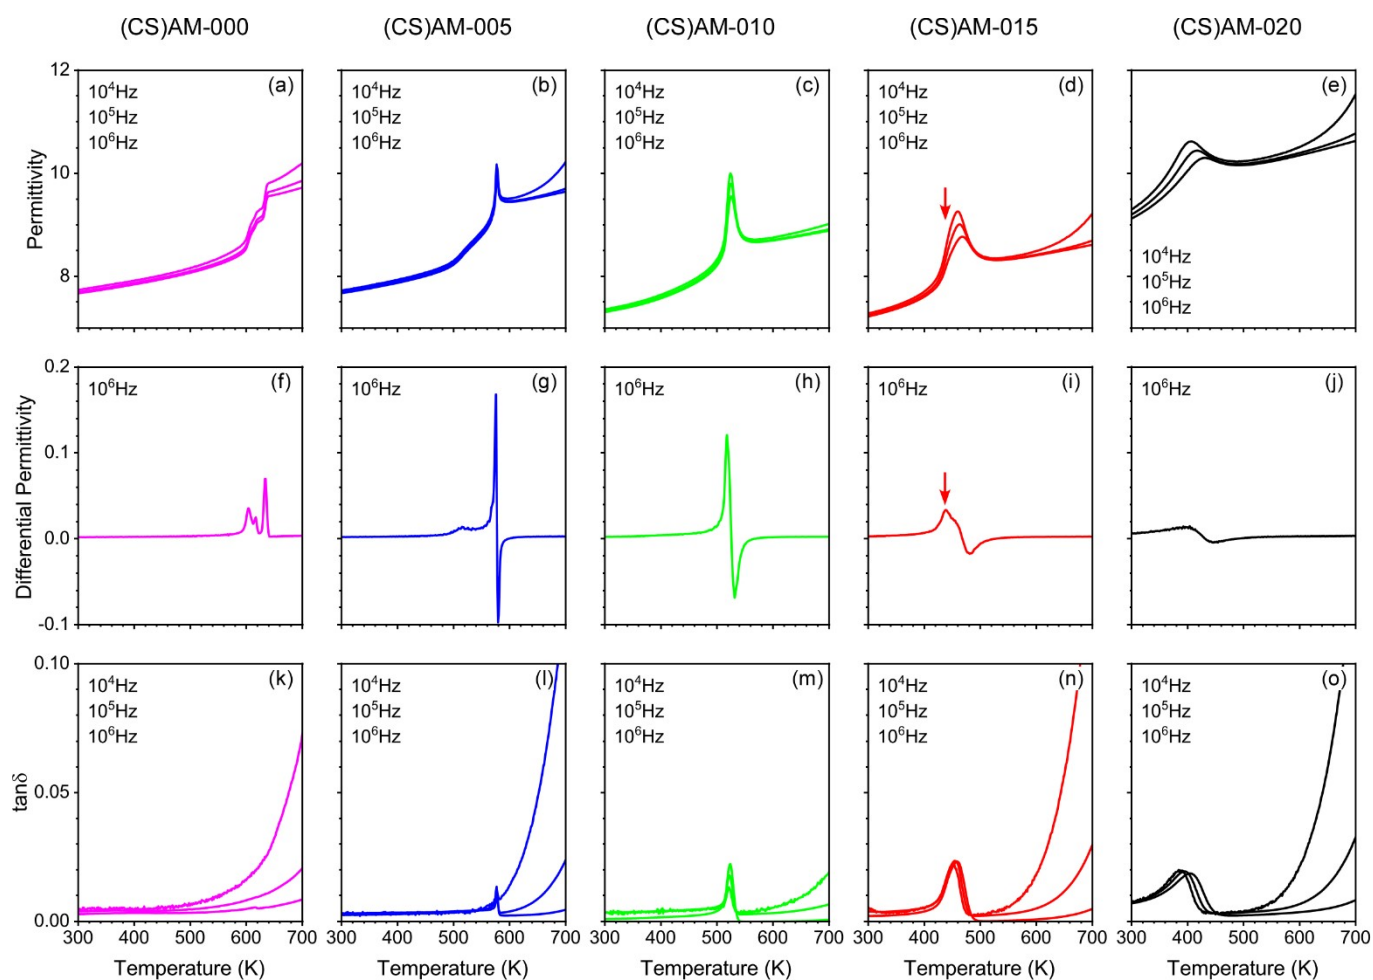

Fig. S1: (a-e) Temperature dependence of the relative permittivity, (f-j) the differential permittivity, and (k-o) the loss tangent ( $\tan\delta$ ) for (CS)AM-x ( $x = 0.00 - 0.20$ ). The results measured at the test frequencies of  $10^3$ ,  $10^4$ , and  $10^5$  Hz are plotted for the relative permittivity and  $\tan\delta$ . For the differential permittivity, on the other hand, the results at  $10^6$  Hz are displayed.
